1 **Title**

2

3 “I found out about Zika virus after she was born.” Women’s experiences of risk communication  
4 during the Zika virus epidemic in Brazil, Colombia, and Puerto Rico.

5

6 **Short Title**

7 A multicountry qualitative study to explore pregnant women's experiences of risk  
8 communication during the Zika virus epidemic

9

10 **AUTHORS**

11 María Consuelo Miranda<sup>1</sup>, Claudia Hormiga Sánchez<sup>2</sup>, Ester Paiva Souto<sup>3</sup>, Edna Acosta Pérez<sup>4</sup>,  
12 Gustavo Corrêa Matta<sup>5</sup>, Marcela Daza<sup>6</sup>, Gabriela Lopes Gama<sup>7</sup>, Camila Pimentel<sup>8</sup>, Marcela  
13 Mercado<sup>9</sup>, Angélica María Amado Niño<sup>10</sup>, Luz Marina Leegstra<sup>11</sup>, Elena Marbán Castro<sup>12</sup>, Olivia C.  
14 Manders<sup>13</sup>, Lauren Maxwell<sup>11\*</sup>

15

16 1 Facultad de Salud, Universidad Industrial de Santander, Fundación INFOVIDA, Bucaramanga,  
17 Colombia

18 2 Facultad de Ciencias de la Salud, Universidad Autónoma de Bucaramanga, Fundación INFOVIDA,  
19 Bucaramanga, Colombia

- 20 3 Interdisciplinary Centre for Public Health Emergencies (NIESP-CEE-FIOCRUZ), Oswaldo Cruz  
21 Foundation, Rio de Janeiro, Brazil
- 22 4 Graduate School of Public Health / Hispanic Alliance for Clinical and Translational Research,  
23 Medical Science Campus, University of Puerto Rico, San Juan, Puerto Rico
- 24 5 Interdisciplinary Centre for Public Health Emergencies (NIESP-CEE-FIOCRUZ)  
25 Center for Data and Knowledge Integration for Health (CIDACS/FIOCRUZ-Bahia), Rio de Janeiro,  
26 Brazil
- 27 6 Grupo de Salud Materna y Perinatal, Instituto Nacional de Salud, Bogotá, Colombia
- 28 7 Professor Joaquim Amorim Neto Research Institute (IPESQ), UNIFACISA University Center,  
29 Paraíba, Brazil
- 30 8 Laboratory for Studies on drugs, vulnerabilities and social markers (LED), Departament of Public  
31 Health (NESC), Aggeu Magalhães Institute - Fiocruz Pernambuco, Recife, Pernambuco
- 32 9 Dirección de Investigación en Salud Pública, Instituto Nacional de Salud, Bogotá, Colombia.
- 33 10 Facultad de Salud, Departamento de Salud Pública, Universidad Industrial de Santander,  
34 Bucaramanga, Colombia
- 35 11 Heidelberger Institut für Global Health, Universitätsklinikum Heidelberg, Heidelberg,  
36 Germany
- 37 12 ISGlobal, Hospital Clínic-Universitat de Barcelona, Barcelona, Spain
- 38 13 Rollins School of Public Health, Hubert Department of Global Health, Emory University,  
39 Atlanta, Georgia, United States of America

40

41 \*Corresponding author: [lauren.maxwell@uni-heidelberg.de](mailto:lauren.maxwell@uni-heidelberg.de)

## 42 **Abstract**

### 43 **Introduction**

44 Providing accurate, evidence-based information to women with Zika infection during  
45 pregnancy was problematic because of the high degree of uncertainty in the diagnosis of  
46 the infection and the associated risk. The 2015-17 Zika virus epidemic overwhelmingly  
47 affected women in countries with limited access to safe abortion. Understanding women's  
48 perspectives on risk communication during pregnancy in the context of an emerging  
49 pathogen can help inform risk communication in response to future outbreaks that affect  
50 fetal or child development.

### 51 **Methods**

52 We conducted a cross-sectional qualitative interview study with 73 women from 7 locations in  
53 Brazil, Colombia, and Puerto Rico to understand women's experiences of ZIKV test and outcome-  
54 related communication during the ZIKV pandemic. We used thematic analysis to analyze the in-  
55 depth interviews.

### 56 **Findings**

57 Participants in Brazil and Colombia reported that the healthcare system's lack of  
58 preparation and organization in communicating ZIKV test results and associated adverse  
59 outcomes led to their feeling abandoned and alone in confronting the challenges of a ZIKV-  
60 affected pregnancy. In contrast, participants in Puerto Rico reported that the regular testing

61 schedules and clear, well-planned communication between the care team and between  
62 providers and pregnant women helped them to feel they could prepare for a ZIKV-affected  
63 pregnancy.

## 64 **Conclusion**

65 Communication of the risk associated with an emerging pathogen suspected to affect  
66 pregnancy and developmental outcomes is a fraught issue. Public health authorities and  
67 healthcare providers should work together in the interpandemic period to understand  
68 families' preferences for risk communication during pregnancy in the presence of  
69 uncertainty and develop a community-informed plan for risk communication.

## 70 **Keywords**

71 Zika virus, risk communication, provider-patient communication, public health emergency,  
72 emerging pathogen, biomedical ethics, Colombia, Brazil, Puerto Rico

73

## 74 **Introduction**

75

76 Risk communication is an essential component of health care, an important part of the  
77 health system's response to an emerging pathogen, and one of the pillars of outbreak  
78 response (1). Healthcare communication includes both cognitive (informational) and  
79 emotional (acknowledgement of needs and feelings) components and must be  
80 contextualised to specific settings and individual and collective needs(2). Healthcare  
81 communication should be clear, accurate, and ideally evidence- and values-based. Health

82 systems and individual providers need to consider probability, level, and the exposure's  
83 effect on the individual, fetal, child, and community health (2).

84

85 While Zika virus (ZIKV) infection is generally subclinical, infection during pregnancy can have  
86 devastating consequences for fetal and child development. Despite global efforts to  
87 improve ZIKV diagnostics and to better understand the risk of adverse fetal, infant, and child  
88 outcomes, myriad uncertainties persist. Close to 80% of infections are asymptomatic, which  
89 reduces the accuracy of diagnostic assays, given that their accuracy decreases with the  
90 length of time from exposure (3). WHO guidance on communication developed early in the  
91 ZIKV epidemic highlighted the need to prioritise access to comprehensive family planning  
92 services (4).

93

94 In this multi-country qualitative study, we explored how women who were pregnant during  
95 the 2015-17 epidemic were informed about diagnostic tests for Zika, the risks associated  
96 with the infection, and the diagnosis of Zika-related illness in their unborn child. In another  
97 manuscript, we summarise findings related to how women who were pregnant during and  
98 after the 2015-17 ZIKV pandemic preferred to receive diagnostic- and outcome-related  
99 information about the diagnostic test result and related outcomes in the presence of high  
100 levels of uncertainty.

101

102 We conducted this study as part of the ZIKV Individual Participant Data (IPD) Consortium  
103 individual participant data meta-analysis (IPD-MA) of ZIKV-related cohorts of pregnant

104 women and their infants and children, initiated in 2017 [CITE COMMENTARY]. Developing  
105 risk prediction models to better inform pregnant women and couples planning a pregnancy  
106 is one of the four key objectives of the ZIKV IPD-MA [CITE PROTOCOL]. Results from this  
107 study are meant to support the development of community-informed models for risk  
108 communication to contextualize findings from the predictive models derived from the ZIKV  
109 IPD Consortium collaboration.

## 110 **Methods**

### 111 **Design and population**

112 Study sites were selected due to the high incidence of ZIKA infection during the outbreak,  
113 the burden of ZIKV-related CZS, differences in access to contraception and legal abortion,  
114 and different levels of gender equity, economic resources, and religiosity. The study team  
115 included investigators at Carlos Albizu University in Puerto Rico, Oswaldo Cruz Foundation  
116 (FIOCRUZ) and the Instituto de Pesquisa Professor Joaquim Amorim Neto (IPESQ) in Brazil,  
117 Universidad Industrial de Santander, Instituto Nacional de Salud, Fundación INFOVIDA, and  
118 Universidad Autónoma de Bucaramanga in Colombia. Interviews were conducted in  
119 Campina Grande, Recife, and Rio de Janeiro, Brazil; Bucaramanga, Neiva, and Barranquilla,  
120 Colombia; and throughout Puerto Rico from Abril 2020 to July 2021 during the COVID-19  
121 pandemic. Site-specific dates, source populations, and procedures for participant  
122 recruitment, interviews, and psychological support during and following the interview are  
123 reported in Appendix Table S1.

124 Participants were women aged 18 years and older, living in *Aedes aegypti*-endemic areas  
125 affected by ZIKV during the 2015-17 outbreak, who were pregnant during the outbreak and  
126 who had and had not had ZIKV-affected children. Participants were recruited through health  
127 clinics, government services, community-based organizations, and social media  
128 organizations in Puerto Rico, through ZIKV cohorts in Colombia and Campina Grande, Brazil,  
129 and mother's organizations in Rio de Janeiro and Recife. The study was conducted on a  
130 rolling basis to allow for the iterative evaluation of data and ensure that emerging themes  
131 could be identified and explored.

## 132 Data collection

133 The study team collaboratively developed separate semi-structured interview guides for  
134 women who did and did not experience an adverse ZIKV-related pregnancy outcome.  
135 Guides were developed by reviewing the ZIKV and risk communication literature and  
136 discussing ZIKV infection during pregnancy with the study team and our colleagues. The  
137 guides were divided into five sections: current experiences with the COVID-19 pandemic,  
138 knowledge about Zika, perceptions of risk, actual and ideal delivery of Zika results to women  
139 pregnant during Zika, and use of de-identified patient data. The guides were pilot-tested in  
140 Brazil among women who would have been eligible for inclusion in the study. Modifications,  
141 including shortening the guide and clarifications related to the section on data sharing-  
142 related attitudes were incorporated into the documents. Interview guides are available on  
143 the Open Science Foundation ([10.17605/OSF.IO/BZE8C](https://doi.org/10.17605/OSF.IO/BZE8C)).

144 *Data collection*

145 In-depth interviews (IDIs) were conducted via Zoom or WhatsApp, depending on participant  
146 preference. The one-time interview, including the five study objectives, lasted between one  
147 and one and a half hours. Interviews were conducted until saturation was reached within  
148 strata (geographical location, women pregnant during ZIKV with and without affected  
149 children), i.e., no new themes emerged (5, 6).

150 *Analysis*

151 IDIs were conducted in Portuguese and Spanish and transcribed and analyzed in the original  
152 language. Deductive codes were developed from the interview guides; the study team  
153 memoed and discussed each transcript to develop inductive codes based on those  
154 conversations. Transcripts were coded thematically using Dedoose software (7) and we help  
155 weekly small group and team discussions to ensure consistent interpretation of the codes  
156 across the study sites and teams. We provide the original and English translation versions  
157 of all quotes and additional supportive quotes in Appendix Table S2. The codebook is  
158 included in Appendix Table S3.

159 *Researcher characteristics and reflexivity*

160 The study team included 17 researchers from various professional backgrounds, including  
161 community-based participatory research, sociology, counseling, qualitative and mixed  
162 methods research, ID diagnostics, and epidemiology. All researchers are fluent in Spanish  
163 or Portuguese; transcripts were discussed and analyzed in their original language.



164 Researchers were from included countries except four team members and had worked  
165 closely with study participant source communities.

## 166 **Research ethics**

167 The study protocol and forms were reviewed and approved by the Ethics Review Committee  
168 (ERC) or Institutional Review Board (IRB) of each site involved in this project before initiating  
169 data collection. These included the WHO ERC, FIOCRUZ, the Emory University IRB, the  
170 Comité Institucional de Ética en Investigación Biomédica (CEIB) of the Centro de Atención y  
171 Diagnóstico de Enfermedades Infecciosas-CDI, and the BRANY IRB, contracted by the  
172 Universidad Carlos Albizu. For remote interviews, participants completed verbal informed  
173 consent; for in-person interviews, participants provided written informed consent.

174

## 175 **RESULTS**

176 We report demographic characteristics of the 73 women from 7 sites who participated in  
177 the study (31 from Brazil, 24 from Puerto Rico, and 18 from Colombia) in Table 1. More than  
178 half of the participants (55%) had a child with at least one of the signs of congenital Zika  
179 syndrome (CZS), while 45% had a child who had not been diagnosed with CZS. Regarding  
180 education levels, the majority across all regions had a graduate level of education, with  
181 Brazil at 42%, Colombia at 39%, and Puerto Rico at 54%. High school education only was  
182 prominent in Brazil (38%) and Colombia (22%), while in Puerto Rico, 17% had a high school  
183 education. Most women were between the ages of 29 and 34.

184

185 Table 1. Research participants’ demographic characteristics (N=73)

|                                 | Brazil (N=31) |      | Colombia (N=18) |      | Puerto Rico (N=24) |      | Total (N=73) |
|---------------------------------|---------------|------|-----------------|------|--------------------|------|--------------|
|                                 | N             | (%)  | N               | (%)  | N                  | (%)  |              |
| <b>Pregnant during ZIKV</b>     |               |      |                 |      |                    |      |              |
| Mothers of children with CZS    | 21            | (68) | 11              | (61) | 8                  | (33) | 40           |
| Mothers of children without CZS | 10            | (32) | 7               | (39) | 16                 | (67) | 33           |
| <b>Average age</b>              |               | 34   |                 | 29   |                    | (30) |              |
| <b>Level of education</b>       |               |      |                 |      |                    |      |              |
| Higher than college             | 13            | (42) | 7               | (39) | 13                 | (54) | 33           |
| Any college                     | 0             | (0)  | 7               | (39) | 4                  | (29) | 10           |
| Any high school                 | 12            | (38) | 4               | (22) | 5                  | (17) | 21           |
| Any primary or middle school    | 6             | (19) | 0               | (0)  | 2                  | (8)  | 8            |
| <b>Marital status</b>           |               |      |                 |      |                    |      |              |
| Married                         | 15            | (48) | 5               | (28) | 9                  | (38) | 29           |
| Cohabiting                      | 13            | (42) | 7               | (39) | 9                  | (38) | 29           |
| Single                          | 3             | (10) | 5               | (28) | 6                  | (25) | 14           |
| Divorced                        | 0             | (0)  | 1               | (6)  | 0                  | (0)  | 1            |

186

187 [Diagnostic testing for Zika infection and communication of results](#)

188

189 Symptomatic participants in Brazil and Colombia generally reported receiving a clinical

190 diagnosis of ZIKV, rather than a laboratory test. In several cases, women were not tested

191 for ZIKV or were not told they had had ZIKV until after an abnormal ultrasound late in  
192 pregnancy or after they had given birth to a ZIKV-affected infant. Pregnant women in Brazil  
193 and Colombia who reported their symptoms or who were tested for ZIKV and received a  
194 positive result were told “not to worry,” that ZIKV was “like an allergy,” or “similar to  
195 Dengue” and was not like rubella or other serious exposures during pregnancy. In some  
196 cases, symptomatic women who asked to be tested said they never received a test (Quotes  
197 1-2, Appendix Table S2).

198

199 *At 2 months, I got Zika. I had an outbreak and I went to the emergency room to get*  
200 *tested, but even I went to the emergency room and they told me to take*  
201 *acetaminophen and that's it, just go home, that is, they told me no. I requested the*  
202 *test and they told me no, so I told him that I was scared because I was pregnant and*  
203 *wanted to do the test and they told me no, that there was no problem, that I should*  
204 *take acetaminophen and nothing else, but yes, to one gives you the uncertainty, but*  
205 *well I was already pregnant and everything and well the truth at the time it hit me, I*  
206 *took it as a passenger, it passed me by and I didn't think about it again, that was*  
207 *almost 7 months was when he began, let's say, to suspect something and all that.*  
208 *Before, it was a completely normal pregnancy.*

209

210 (CZSN004, Colombia, Mother of a child with CZS, under 25)

211

212 *When I got pregnant with [child's name], I was 12 weeks and I started... I developed*  
213 *a really bad itch and this itch got so... bothered me so much that I had to go to the*  
214 *ER and then to the ER. .. and I asked him how could this affect my baby. The doctor*  
215 *didn't say anything, that it was like dengue and that it was going away. He gave me*  
216 *an allergy medicine, some ultrasounds. I took the allergy medicine. I had this itch for*  
217 *four days. I had the ultrasounds and everything was normal.*

218

219 (BRID\_SPECP12, Brazil, Mother of a child with CZS, age 25-34)

220

221 In contrast, in Puerto Rico, where the ZIKV epidemic began later than in Brazil and Colombia  
222 and which had the full financial and laboratory support of the US-CDC, ZIKV diagnostics were  
223 incorporated into routine prenatal care(8). Health providers asked that women bring  
224 someone to accompany them when receiving the test result. Women who received a  
225 positive test result were immediately referred to a specialized care center for weekly follow-  
226 up visits. In contrast to Brazil and Colombia, women in Puerto Rico reported that the  
227 possible consequences of infection in the child were explained to them in detail (Quotes  
228 3-4, Appendix Table S2).

229

230 *The first tests...well, everything went well. One day I had a routine appointment with*  
231 *the gynecologist and he... I told him, I told him that he had a rash all over his body.*  
232 *So the doctor prescribed a soap for my skin to calm the itching and what the rash*  
233 *was and gave me some antibiotics. Then he told me: "We are going to repeat the*

234 *Zika test because you are going to be entering what would be the third trimester to*  
235 *repeat it before [you give birth].” When the results come in, they tell me: “Mom, you*  
236 *came out positive for Zika.”*

237

238 (ID304, Puerto Rico, Mother of a child with CZS, age 25-34)

239

240 *He told me, “here in all these you came out negative. In the only one you came out*  
241 *positive was Zika, so you have Zika”. From there, I opened my eyes very wide, despite*  
242 *the fact that I already suspected it, because I had a little faith that it wasn't, that it*  
243 *was just silly what I had had and it wasn't that. So there she told me the [public*  
244 *hospital] protocol. So now I had to go to a perinatologist who specializes in pregnant*  
245 *moms with Zika.*

246

247 (ID305, Puerto Rico, Mother of a child with CZS, age 25-34)

248

249 *Explanation of ZIKV test results and associated uncertainty*

250

251 Some participants in Brazil and Colombia received a ZIKV test but were never given the  
252 results. In Brazil and Colombia, where results were often delivered by health authorities  
253 rather than the women’s health care provider, when they did receive the results, women  
254 reported that they received minimal information on what the results could mean and no

255 information related to uncertainty in the results or the associated risk (Quotes 5-8,  
256 Appendix Table S2).

257

258 *I think that they also have to explain to one, surely one does not know what effects*  
259 *it brings, because to me, for example, they only told me that I had Zika and that it*  
260 *was a disease that could affect the baby, that it deformed it, that was all.*

261

262 (NOCZS008, Colombia, Pregnant during ZIKV, not adverse pregnancy outcome, 35 or  
263 over)

264

265 In other cases, participants who were tested were simply informed that their result was  
266 "positive" or that "everything was fine," but did not receive additional information or have  
267 access to the test report. While some participants in Puerto Rico also reported receiving  
268 limited information about the meaning of the test result, most participants in Puerto Rico  
269 said that they reviewed and discussed the results with the healthcare provider.

270

271 In Colombia, several participants whose children were born with CZS were not told about  
272 the results of the ZIKV laboratory test, which led to uncertainty about the cause of their  
273 infant's neurological disorder.

274

275 *They (health personnel) said [the microcephaly] was due to Zika, they immediately*  
276 *said that they associated it with Zika, but in itself, there is no blood test that certifies*

277 *that it is due to Zika, that is, since he was born in the month of Zika children, they*  
278 *put him there with them, but there is no blood test that tells me if it is due to Zika.*

279

280 (CZSBQ002, Colombia, Mother of a child with CZS, under 25)

281

282 In Brazil, several mothers did not receive information about their ZIKV status until after  
283 giving birth to a ZIKV-affected child. At that point, the diagnosis was not relevant to them  
284 (Quotes 7 and 8, Appendix Table S2).

285

286 *So, I already knew the result, because after he was born we saw that he had*  
287 *microcephaly. I already knew it was from Zika, the result was the least important,*  
288 *the positive result for Zika was less important, as I already knew, I knew that I had*  
289 *microcephaly.*

290

291 (SPECPO1, Brazil, Mother of a child with CZS, age 25-34)

292

293

294 *When this result came out I already knew, he was already a year and a bit old, he*  
295 *was 1 year and 4 months old more or less [child's name], we were already in*  
296 *treatment. ... she had the tomography done and came to the doctor, so she (doctor)*  
297 *said that [child's name] had cerebral palsy and microcephaly and had calcifications,*

298 *well, then, she already knew that [child's name] had microcephaly, then after In 1*  
299 *year I found out that it really was, it was because of Zika.*

300

301 (SCGBS06, Brazil, Mother of a child with CZS, under 25)

302

303 In several cases, women gave birth to an affected child after being told they had tested  
304 negative for ZIKV. Almost no participants reported being informed that they could have ZIKV  
305 although the test was negative or visa versa. One participant from Brazil who had received  
306 multiple ZIKV tests said that they felt that the conflicting test results reflected the  
307 uncertainty of the moment.

308

309 When women were diagnosed with ZIKV infection towards the end of pregnancy, they were  
310 generally told that their infant had passed the relevant developmental stages and they  
311 should not worry. (Quotes 9-10, Appendix Table S2).

312

### 313 [Diagnosis of Zika-related neurological disorder](#)

314

315 The diagnosis of fetal neurologic impairment attributable to Zika infection was based on  
316 ultrasound findings, specifically microcephaly and cerebral calcifications, whether or not  
317 there was a clinical or laboratory history of maternal, fetal, or infant Zika infection. In Brazil  
318 and Colombia, ZIKV-related neurological complications were always identified late in



319 pregnancy, regardless of whether women were receiving special follow-up related to their  
320 ZIKV diagnosis.

321

322 For women who presented with ZIKV-type symptoms during pregnancy, the fetal  
323 neurological complications became the de facto confirmation of maternal Zika infection.

324 Many women were asymptomatic and, in some cases, both asymptomatic and symptomatic  
325 women who had affected children had received a negative test result. In these cases, the

326 neurologic abnormalities identified through a late-stage ultrasound were a complete

327 surprise. A few women in Brazil and Colombia were pregnant early on in the pandemic and

328 did not learn about ZIKV until after giving birth to an affected child (Quotes 12-15, Appendix  
329 Table S2).

330

331 *When I got pregnant that I was infected with this virus, they only told me it was*

332 *Chikungunya, that they didn't know what could happen. I reported that I was*

333 *pregnant and then nobody could tell me what could happen, and then, I had a little*

334 *bleeding, and I went ahead with the pregnancy, it came out in the twelfth week of*

335 *pregnancy, so since nobody knew anything about it, there was no way to knowing*

336 *what the pregnancy, fetus, postpartum, or whatever would be like, everything was*

337 *very surprising for me, for me I only found out about the Zika virus after she was*

338 *born, which was when they also began to be born in the Northeast, all with*

339 *microcephaly , and when they began to do the tests, they saw that it was actually*

340 *microcephaly due to the Zika virus.*

341

342 (SRJEP03, Brazil, Mother of a child with CZS, 35 or over)

343

344 Women in Brazil and Colombia who were diagnosed after ZIKV was known to cause fetal  
345 abnormalities but early in the epidemic were confronted with unprepared providers who  
346 were themselves surprised by the ultrasound findings.

347

348 *Then he (gynecologist) calculated [the head circumference], and calculated it. "It just*  
349 *doesn't work, it doesn't work, the head is not the size it should be for the time of*  
350 *pregnancy." When he looked at the ultrasound nothing, nothing. He called another*  
351 *primatologist who was there, "maybe I was wrong, maybe I did something wrong,*  
352 *let's confirm." And he came back, came back and the other man also looked and*  
353 *nothing, definitely not. Then another one came and also says the same. So they*  
354 *stayed, just like they hadn't had, just like, like many cases like that. So close, they*  
355 *began to worry, then to explain to me what had happened. "This is what happened."*  
356 *He asked me, "did you have a fever? Did you have any symptoms of that?" He asks*  
357 *me the questions and I did. When I was 8 weeks pregnant I got a fever, spots like*  
358 *that, pain in the joints, a headache, but they never told me anything. I went and they*  
359 *never told me anything that I had to look at, do a deeper follow-up, that is, nothing*  
360 *different from an ultrasound... So, the doctor immediately told me no, that the baby*  
361 *most likely came with microcephaly because, how is it? The little head was not, her*  
362 *brain it was not fully developed, it was smaller than the time, that for the time of*

363 *pregnancy that I had, it did not have the size that it was. And so he sent me a series*  
364 *of tests to rule out.... It was the first time they sent me to do a blood test to find out*  
365 *if I had had Zika or not, that same day they did it.*

366

367 (CZSBQ001, Colombia, Mother of a child with CZS, age 25-34)

368

369 *Doing the ultrasound on him (gynecologist) some, some, uh... some measurements*  
370 *did not add up, he told me "no, it's that suddenly my ultrasound machine was*  
371 *damaged," he came back and did it, came back, erased, turned off and when he told*  
372 *me, "we have to do some more in-depth tests, suddenly my ultrasound machine is*  
373 *failing me and well I have to do something to him", then I told him how come? Then*  
374 *he told me that some measurements of my son's head circumference did not add up,*  
375 *eh in his little head, "he explains more in Spanish" I told him, and that well we had*  
376 *to carry out some tests, then he gives me the formula, I he gave the orders for me to*  
377 *have them done by the EPS and, well, that was in a matter of 15 days, because of the*  
378 *priority, he did give it priority and after 15 days they did it for me...the doctor,*  
379 *thinking that I already knew the diagnosis, told me, "yes, indeed the child has his*  
380 *calcifications, the child has microcephaly and tatata...tatata" and he tells me*  
381 *everything as one, right?*

382

383 (CZSBUCA002, Colombia, Mother of a child with CZS, age 25-34)

384

385 In one case, a participant in Brazil with an abnormal fetal ultrasound later in pregnancy felt  
386 that her provider did not give her information on microcephaly and she had to depend on  
387 the media for information.

388

389

390 *We were already following it [the outbreak], with fear, but I had great faith that*  
391 *nothing was going to happen. I was still in the ultrasound room, right, when the*  
392 *difference came, she said, really now there was a difference in head circumference.*  
393 *And there we already knew what microcephaly was, but she didn't explain much*  
394 *either. It was her first case... here in Rio, it was the first case in this outbreak that she*  
395 *was caring for a woman, a child, no? with microcephaly. So she also didn't explain*  
396 *much to me, it was only on the media.*

397

398 (BRID\_SRJEP06, Brazil, Mother of a child with CZS, age 25 - 34)

399

400 Most Colombian and Brazilian interviewees whose children had adverse ZIKV-related  
401 neurological outcomes were told about their child's condition towards the end of pregnancy  
402 or at birth. The ZIKV test was ordered following the detection of an abnormality on  
403 ultrasound rather than visa versa. Colombian and Brazilian mothers reported that not being  
404 told earlier prevented them from preparing emotionally and logistically for their child's  
405 disability. In Colombia and Brazil, women reported a lack of continuity in health care  
406 providers wherein the provider who interpreted the ultrasound was not the provider

407 engaged in ZIKV-related follow-up. The lack of continuity caused gaps in communication  
408 and information that exacerbated the already difficult situation for mothers with affected  
409 pregnancies (Quotes 16-18, Appendix Table S2).

410

411 *E: Did you hear or what could happen if a pregnant woman had Zika?*

412 *P: When I used to talk about microcephaly, because when I saw on television that I*  
413 *was most likely to have these children with microcephaly, it was something that I*  
414 *had never seen talk about microcephaly, never in my life, I was very afraid.*

415 *She was there, it was when she (doctor) said "she was a child with microcephaly",*  
416 *she was just doing it, so she didn't need to do anything because she was desperate*  
417 *at the time, right?. I didn't know what microcephaly was, and she didn't explain*  
418 *anything to me, she explained it to me, "oh, it's like that", maybe I used oil at that*  
419 *time... I'm tempted to get rid of the magic, but I don't eat and eat very brave with*  
420 *that doctor, I wanted to place all the blame on her, you know, how she felt that she*  
421 *was destroyed or my dream.*

422

423 (BRID\_SCGBS01, Brazil, Mother of a child with CZS, 35 or over)

424

425 *E: Who were you with that day when they explained everything about your baby?*

426 *P: With my husband... It turns out that the first day I went with my oldest girl to meet*  
427 *the baby, but since I didn't expect to be given that news, I got sick, right? Then I got*  
428 *very sick and it left when the doctor explained it to me, because I began to see her*

429 *face, I saw that she was talking to the other doctor and that I saw that something*  
430 *was wrong with them, I began to suspect. When they explained the situation to me,*  
431 *I was not well, I got sick and left the consultation. I got out and went to the street,*  
432 *because I got really sick, so this... and I didn't want my older girl to see what was*  
433 *happening, I didn't want her to notice her, because I didn't know how to explain it to*  
434 *her. I felt bad because she had gone to meet the baby and we couldn't show it to her.*

435

436 (CZSBQ001, Colombia, Mother of a child with CZS, age 25-34)

437

438 *... they [doctors] always told me that this was a new disease, that it was a disease*  
439 *that was not known, that they were not certain that it was going to happen, that in*  
440 *all the children it was behaving differently, that it had to be prepared for the good*  
441 *and for the bad, that I not have so many illusions.*

442

443 (CZSBUCA002, Colombia, Mother of a child with CZS, age 25-34)

444

445 In contrast, interviewees who had tested positive during pregnancy in Puerto Rico, where  
446 regular ZIKV testing was incorporated into routine prenatal care, were immediately referred  
447 to specialized care, facilitating early access to ultrasound and allowing women to prepare  
448 better to welcome their ZIKV-affected infant (Quote 19, Appendix Table S2).

449

450 *There was a boom, the outbreak was like there in Brazil and the media reported that*  
451 *the problem that the mothers were having when... was the problem of the babies,*  
452 *mainly that they were having problems when they were born. So what she [doctor]*  
453 *told me was that she sent me to the perinatologist all the time. She did not give me*  
454 *a regular sonogram because the perinatologist sees everything more specifically if*  
455 *there is any defect or inefficiency in the baby. That's why the care was more intense*  
456 *compared to my other pregnancy, which was normal. It was very intense and she*  
457 *was very meticulous. She was very precise in everything.*

458 *All interviewees with a child affected by Zika described the personal challenges they*  
459 *faced when receiving information about their child's condition. However, those who*  
460 *received information in private, in a calm and considerate manner, felt that the*  
461 *deliberate, thoughtful way the information was provided helped them cope with the*  
462 *difficult situation.*

463

464 (ID305, Puerto Rico, Mother of a child with CZS, age 25-34)

465 *Interaction between delivery of information and women's cultural beliefs*

466

467 In delivering information about their fetus's condition, women highlighted the importance  
468 of providing the information in a way that respects their cultural and religious beliefs,  
469 especially around abortion (Quote 20, Appendix Table S2).

470

471 *He took me to his (doctor's) office, outside, where they did the ultrasound, we sat*  
472 *down, he talked to us, he talked to us, he told us the things, let's say positive, the*  
473 *negative things that the girl's condition could have, it was sincere from the*  
474 *beginning, because he didn't tell me, "no, the girl is bad and you won't be able to do*  
475 *anything". He told us the girl is not doing well, but I can't tell you what God's will is*  
476 *either. When they talk to you like that, even though you're in pain, it's different from*  
477 *being told: "no, the girl is bad... no, look, you have to go somewhere and go and do*  
478 *this, I don't know, now it is your decision". But he, however, told us: you have the*  
479 *right to an interruption of the pregnancy if you want, if you want, it is not an*  
480 *obligation.... as I say, [the doctor] was very subtle in saying things, so I say that to*  
481 *explain that to him, so that one does not remain so, so traumatized.*

482 (CZSBQ001, Colombia, Mother of a child with CZS, age 25-34)

483

484 Women who were told that it would be better to abort the pregnancy because of the  
485 severity of the fetal condition felt that the way that the information was delivered was itself  
486 traumatizing and referred to the difficulty of being presented with the fetal anomaly and  
487 suggestion to abort at the same time without time to digest the information related to the  
488 fetal condition (Quote 23, Appendix Table S2).

489

490

491 *It was, "He has microcephaly, look", so I said "yes, and now what do I do?", then he*  
492 *said "look, I'll be honest, your son will not walk, he will not speak, he will not listen,*



493 *he will live in a vegetative state on top of a bed and I sincerely believe that he will*  
494 *not live more than 1 year. If I were you, I would ask God to take him away from me,*  
495 *because you are very young and he is going to interfere in your life, maybe you will*  
496 *have the opportunity to have other children.” Then I arrived, I was like, looking at his*  
497 *face, because then I didn't need that diagnosis, he didn't have to say that... you*  
498 *understand?, I just wanted to know what I would do from then on, look for the*  
499 *specialists... .*

500  
501 *Then he just threw it away, put the paper on top of my gurney, turned around... when*  
502 *he turned his back to me there was this scream, like, you know, from the inside,*  
503 *"Hey," so I said, "What professional quality are you? " ..then I know that I began to*  
504 *argue with him, I told him "and this is not the procedure of a professional, of simply*  
505 *coming and telling a mother what she is going to be, how long she is going to live, I*  
506 *did not ask her for that, I asked him from now on what I should do and who I should*  
507 *look for.”*

508  
509 *...“Why don't you ask for other tests so that we can confirm them? now you get to*  
510 *throw a bomb at me, you turn around and walk away. That's not how things work,*  
511 *you see, friend. Learn to be a professional, because you chose your profession, but*  
512 *my son and I did not choose to be in this situation and you have to treat us as*  
513 *people” ...I ended up crying more because of the way he spoke to me than because of*  
514 *the diagnosis with me, you know ?.*

515

516 (BRID\_SPECP12, Brazil, Mother of a child with CZS, age 25-34)

517

518 How women who learned that they had a ZIKV-affected fetus considered and felt about the  
519 option of aborting the pregnancy varied by the way the information was delivered, abortion  
520 access issues, and their own religious and personal beliefs. In Colombia, participants felt  
521 that providers presented the option to abort at the same time that they learned about the  
522 ZIKV-affected pregnancy, and they insisted that abortion was the “best” option. They felt  
523 that the information was delivered in an insensitive way without feeling, making it harder  
524 for them to decide.

525

526 When Colombian women did decide to terminate a ZIKV-affected pregnancy, they found  
527 that pregnancy termination was not available given their gestational age and barriers to  
528 abortion access. In contrast, women from Puerto Rico and Brazil felt that the option to  
529 terminate the pregnancy was presented in a calm rather than an abrupt manner, which  
530 allowed them to consider whether to terminate the pregnancy (Appendix Table S2,  
531 supportive quotes 22-24). Participants highlighted religious beliefs and the difficulty of  
532 having a disabled child as major factors in considering pregnancy termination (Appendix  
533 Table S2, supportive quotes 25-26).

534

535 **DISCUSSION**

536

537 Risk communication during pregnancy in the presence of uncertainty in both the accuracy of the  
538 diagnostic and the probability of an adverse outcome is a fraught issue and becomes especially  
539 complicated in countries with inequitable access to vector control measures, contraception, and  
540 safe abortion. Risk communication during pregnancy must incorporate local values and realities  
541 around access to safe, quality abortion. In this multicountry, cross-sectional qualitative study,  
542 we learned from 73 women who were pregnant during the 2015-2017 ZIKV epidemic  
543 about their experiences receiving, or not, their ZIKV test results and information about the  
544 expected or actual effects of ZIKV exposure on their pregnancy.

545 We found that, while women's experiences of risk communication were relatively stable within  
546 countries, there were important cross-country differences in women's experiences. Women who  
547 were pregnant during ZIKV in Brazil and Colombia frequently were not tested for ZIKV or did not  
548 receive their ZIKV test results and learned that they had a ZIKV-affected pregnancy during the first  
549 abnormal ultrasound scan. In contrast, in Puerto Rico, where the epidemic wave was later than in  
550 Brazil and Colombia and which received significant logistic and financial support from the US-CDC,  
551 ZIKV testing was incorporated into routine clinical care and results were regularly and  
552 systematically communicated to participants. Similarly, while participants in Brazil and Colombia  
553 reported being informed abruptly about their ZIKV-affected pregnancy and not connected to  
554 resources to either make the decision about pregnancy termination or determine pathways for  
555 supporting their ZIKV-affected child, those in Puerto Rico said that they were asked to bring their  
556 partner or another support person when learning about their ZIKV test result and women with  
557 ZIKV-affected pregnancies were immediately referred to specialized follow-up and related  
558 resources. While the health system response in Brazil and Colombia amplified women's distress  
559 upon learning about their ZIKV-affected pregnancy, women in Puerto Rico received more  
560 comprehensive information in a calm manner. Participants in Puerto Rico were more likely to learn

561 their test results and the associated risk from being part of a coordinated team than women in  
562 Brazil and Colombia.

### 563 **Strengths and limitations**

564 The main strengths of this research are the transnational composition of the sample and  
565 the research team. The diversity of the sample made it possible to compare women's  
566 experiences across health systems and different contexts within and between countries.  
567 This study had some limitations. The gap between the Zika epidemic and fieldwork may  
568 have made it difficult to recall details of the ZIKV testing process or risk communication  
569 during pregnancy. However, this fact made it possible to capture the reinterpretation that  
570 the participants made of their experiences, in light of the lessons learned from raising  
571 their children, especially those who had to face the presence of Zika at home. Another  
572 limitation was the impossibility of conducting most of the interviews face-to-face due to  
573 the COVID-19 pandemic. Other studies suggest that participants can meaningfully engage  
574 in remote qualitative interviews (9). Lastly, the time between data collection and  
575 publication of our findings is a limitation. Like the participants, our team found ourselves  
576 on the front lines of COVID-19 response while still trying to complete this study.

### 577 **Differences in care across countries**

578 Risk communication differed importantly across countries. Participants who were pregnant  
579 during the ZIKV epidemic in Brazil and Colombia generally reported a clinical diagnosis of  
580 Zika with no subsequent initiation of special follow-up and no communication about the

581 risks associated with a positive result or the uncertainty associated with the diagnostic. Few  
582 said that they had been tested when they presented with symptoms. Some participants  
583 reported asking to be tested for ZIKV because they recognized the signs of infection from  
584 information received from mass media. Participants reported that they were not tested  
585 then, but that "more specialized" ultrasounds were performed later in pregnancy. In  
586 contrast, participants from Puerto Rico reported repeated laboratory tests during  
587 pregnancy and participants who received a positive test result were immediately referred  
588 to a specialized care center.

589 Participants did not report being informed of the possibility of having ZIKV infection despite  
590 having a negative result or vice versa. Some women who were pregnant during the  
591 epidemic and whose children did not present clinical evidence of neurological alteration at  
592 the time of the interview were informed about the possibility that their children would not  
593 be affected by the infection after receiving a positive test result because the infection  
594 occurred at a late stage of gestation or because they did not present symptoms. Participants  
595 were sometimes told that ZIKV infection during pregnancy was not an important concern,  
596 like an allergy, and was unlikely to be related to adverse pregnancy outcomes. While we  
597 found significant differences in women's experiences of learning about their test results and  
598 related fetal or infant outcomes, we did not find such differences across sites within  
599 countries.

## 600 Country-level differences in ZIKV-related testing, follow-up and risk communication

601 The findings on the diagnostic process of Zika in pregnant women and of neurological  
602 alteration in their children mirror the differential care trajectories across the three countries  
603 during the 2015-17 ZIKV epidemic. In Colombia and Brazil, although some of the women  
604 interviewed were diagnosed with ZIKV via a laboratory test and referred for specialized  
605 follow-up, most participants reported difficulty in accessing diagnostic tests for ZIKV or were  
606 tested without being given the time result. Most women from Brazil and Colombia with  
607 ZIKV-affected pregnancies learned about fetal neurological alteration late in pregnancy.  
608 Their experience contrasted with Puerto Rico, where ZIKV testing was incorporated into  
609 routine care and the health system had time, and perhaps the funding and political will to  
610 implement a supportive, transparent system of communication and equitable connection  
611 to follow-up services for women with affected pregnancies.

612 These country-level differences can partly be explained by the spatiotemporal evolution of  
613 the ZIKV epidemic, which initially emerged in Northeastern Brazil and then spread to  
614 Colombia and later to Puerto Rico. As the epidemic progressed, other countries in Latin  
615 America and the Caribbean gained experience and ministries and health services developed  
616 more comprehensive training and educational resources for health personnel, patients, the  
617 general population, and social media campaigns. This evolution corresponds to the  
618 paradigm proposed by Débora Diniz of "generations" of women affected by ZIKV, the first  
619 generation being those who learned the virus was circulating by discovering it in their own  
620 bodies (10).

## 621 Country-level responses to the 2015 ZIKV epidemic

622 As the first country to respond to the 2015 epidemic, the Brazilian Federal Government  
623 prioritized vector control actions. In addition, resources were invested in the care and  
624 reception of people affected by the ZIKV and microcephaly in the Unified Health System  
625 (SUS). Simultaneously, research initiatives were promoted with the participation of the  
626 public health surveillance system and national and international institutions, seeking to  
627 accelerate the development of innovations for the response to the virus and the  
628 development of communication strategies for different audiences(11). Despite the  
629 government's efforts, structural actions, including basic sanitation and water supply issues,  
630 access to contraception or safe abortion care, and the gender, race and class dimensions of  
631 epidemic response were not well addressed.

632 Following actions in Brazil, Colombia implemented the Zika Fever Response Plan, which  
633 focused on strengthening surveillance systems for vector-borne diseases and increasing  
634 health education, prevention, and vector control. The plan includes guidance for health  
635 professionals on prevention strategies, diagnostic criteria, follow-up in suspected or  
636 confirmed cases, counselling to guide voluntary termination of pregnancy, and psychosocial  
637 support, among others (12) (13). However, the plan was implemented in 2016, after the  
638 epidemic peak in Colombia. Non-standardized health care during much of the epidemic, as  
639 well as the country's testing protocol, which required samples be sent to the National  
640 Institute of Health in Bogota, the only reference laboratory for ZIKV diagnostic tests, meant  
641 that test results could not be returned in a timely fashion(13). These barriers to testing and

642 risk communication were reflected in women's accounts of their experiences with risk  
643 communication during ZIKV in Colombia and are similar to the findings from other research  
644 conducted with Colombian women who were pregnant during the ZIKV epidemic (14, 15).

645 Puerto Rico, as a US jurisdiction, received support from the Centers for Disease Control and  
646 Prevention (CDC) and was part of the Zika Virus Preparedness, Response, and Recovery Plan  
647 from April 2016. The plan included staff training, the development of educational materials  
648 for pregnant women, community outreach strategies, guidance for travellers on and off the  
649 islands, and Puerto Rico developed a vector control and laboratory testing action plan.  
650 Additional strategies focused on preventing sexual transmission (media communications  
651 and community education) and surveillance and monitoring of pregnant women for follow-  
652 up of positive Zika tests, including for blood donations (16). In a multisectoral effort, the  
653 CDC Foundation, the Department of Health, Puerto Rico Obstetrics & Gynecology, the  
654 Primary Health Association of PR, the University of Puerto Rico, and other community,  
655 private, and public organizations carried out the Zika Contraceptive Access Network to  
656 provide women in Puerto Rico with free long-term contraceptive alternatives in a single  
657 medical appointment. Analysis of this multisectoral initiative demonstrated that access to  
658 effective contraceptive methods and other reproductive health services, which were and  
659 continue to be very limited in Puerto Rico, reduced costs of care, increased access to a full  
660 range of contraceptives, training of health care providers on counseling, patient-centered  
661 contraceptive practice, and implementation of a robust public education campaign (17).  
662 Evaluations of the plan's implementation, conducted with CDC leadership, demonstrated



663 the importance of collaboration between CDC and US state and territorial government  
664 offices in strengthening capacity to respond to this emerging public health threat (16).

665 The temporal and spatial evolution of the epidemic meant that Puerto Rico had additional  
666 time to develop a comprehensive response, which was likely further supported by the large,  
667 well-funded infrastructure of US-CDC. Puerto Rico's approach of including ZIKV testing as  
668 part of antenatal care and early referral of women with affected pregnancies to specialized  
669 care, which continues today differs meaningfully from the situation in Colombia and Brazil  
670 (18) .

#### 671 [Gender inequities and Zika](#)

672 As with ZIKV, ID outbreaks disproportionately affect the most marginalized groups who lack  
673 equitable access to preventative measures, diagnostics, and care (19). Addressing complex  
674 emergencies requires a human rights approach with a gender perspective, which becomes  
675 even more critical for vulnerable populations, including pregnant women (19). Analyses of  
676 the Ebola and Zika responses identified gaps in addressing structural gender inequities and  
677 an over focus on preventative measures (e.g., safe sex, bed nets) with the assumption that  
678 different groups of women are equally able to make these decisions (19) Autonomy to make  
679 sexual and reproductive health decisions is framed by socially established gender norms  
680 and closely related to socioeconomic status meaning that those at highest risk of ZIKV  
681 infection in pregnancy were also those least likely to be able to implement preventative  
682 measures or to access safe abortion care in a restricted setting (13). In Brazil, the ZIKV public  
683 health campaigns focused on women's need to prevent unwanted as a means to reduce

684 ZIKV vulnerability rather than men and women’s shared responsibility (20, 21). In Colombia,  
685 the most developed component of the Zika Fever Response Plan was vector control. At the  
686 same time, sexual and reproductive health consequences were considered at the national  
687 level but not operationalized in local contexts. In addition, the Colombian Zika Fever  
688 Response Plan was not aligned with the National Policy on Sexual and Reproductive Rights  
689 or the Ten-Year Public Health Plan in force during the ZIKV epidemic (13).

690 The wealthiest women have both better access to birth control and safe abortions, which is  
691 particularly important in countries with restrictive abortion laws like Brazil and Colombia  
692 (19, 22). However, Colombia recently decriminalized abortion up to 24 weeks of gestation  
693 (23). We found that early ZIKV diagnosis may facilitate access to safe abortion and is  
694 important to women who, for religious reasons, prefer not to terminate their pregnancy as  
695 they need time to prepare emotionally and to identify resources internal and external to  
696 their families and communities to support best their ZIKV affected infant. Women  
697 universally reported distress and feeling that their cultural and religious beliefs were  
698 disrespected when they were presented with the option to terminate the pregnancy  
699 alongside the abnormal ultrasound findings.

700 Particularly in Colombia, termination of pregnancy was reported as a hastily communicated  
701 option offered immediately following the news of abnormal ultrasound, which women saw  
702 as insensitive and disrespectful of their personal and family beliefs regarding abortion.  
703 Women’s preferences for discussing pregnancy termination in the context of risk  
704 communication need to be carefully considered in the cultural, religious, and legal context

705 (13). Our findings that many participants saw raising their ZIKV-affected infant as an  
706 expression of God's will are similar to qualitative research related to pregnancy termination  
707 decision-making in the context of the ZIKV epidemic conducted in Brazil, Puerto Rico, and  
708 mainland US and are especially important in the Latin American community where faith and  
709 spirituality are closely linked to health care decision-making (24). Women need to have  
710 enough information and time to make an informed decision about terminating a pregnancy,  
711 free from external pressures or restrictions. The lack of support for the mother's mental  
712 health, supporting the mother together with their ZIKV-affected child, and support for  
713 families with ZIKV-affected children were highlighted as significant issues by Brazilian and  
714 Colombian study participants. Discussing the emotional and physical consequences for  
715 mothers and families and the lack of adequate financial and therapeutic support for ZIKV-  
716 affected children were major sources of distress for Brazilian and Colombian mothers as  
717 they described their experience learning about their ZIKV affected pregnancy. In the  
718 healthcare response to an emerging pathogen that affects fetal development, women  
719 should have the support of the state for both continuing their pregnancy and raising their  
720 affected child or terminating their pregnancy.

## 721 Conclusion

722 Women who were pregnant during ZIKV in Puerto Rico tended to report more neutral or  
723 positive experiences, while women in Colombia and Brazil felt negatively about how the  
724 ZIKV diagnosis and associated risks had been communicated. Overall, participants  
725 expressed a desire for transparent communication about what was known and not known

726 rather than no communication when the accuracy of the results or the probability of an  
727 adverse outcome could not be assured. Health systems need to consider the changing  
728 landscape of access to contraception and safe abortion and the preferences of WRA and  
729 their partners for learning about the risks of emerging pathogens suspected to affect fetal  
730 or infant development before the next epidemic of an emerging infectious disease.

### 731 Acknowledgments

732 Above all, we would like to thank the participants from all sites and countries for sharing  
733 their insights and time in support of this study, especially the mothers of children living with  
734 the adverse effects of fetal exposure to ZIKV. In addition, we would like to thank Atisha A.  
735 Gómez-Reyes and Vivian Torres of the University of Puerto Rico for their support with data  
736 collection and management.

### 737 References

- 738 1. Kirk Sell T, Ravi SJ, Watson C, Meyer D, Pechta LE, Rose DA, et al. A public health systems  
739 view of risk communication about Zika. *Public health reports*. 2020;135(3):343-53.
- 740 2. Levetown M, Bioethics Co. Communicating with children and families: from everyday  
741 interactions to skill in conveying distressing information. *Pediatrics*. 2008;121(5):e1441-e60.
- 742 3. Musso D, Ko AI, Baud D. Zika virus infection—after the pandemic. *New England Journal of*  
743 *Medicine*. 2019;381(15):1444-57.
- 744 4. Organization WH. Risk communication in the context of Zika virus: interim guidance. . 2016.
- 745 5. Saldaña J. *The coding manual for qualitative researchers*: sage; 2021.
- 746 6. Hennink MM, Kaiser BN, Marconi VC. Code saturation versus meaning saturation: how many  
747 interviews are enough? *Qualitative health research*. 2017;27(4):591-608.

- 748 7. Los Angeles CSRC, LLC. Dedoose Version 9.0.17, cloud application for managing, analyzing,  
749 and presenting qualitative and mixed method research data. 2021 [Available from:  
750 [www.dedoose.com](http://www.dedoose.com).
- 751 8. Dirlikov E, Ryff KR, Torres-Aponte J, Thomas DL, Perez-Padilla J, Munoz-Jordan J, et al.  
752 Update: ongoing Zika virus transmission—Puerto Rico, November 1, 2015–April 14, 2016. *Morbidity  
753 and Mortality Weekly Report*. 2016;65(17):451-5.
- 754 9. Reñosa MDC, Mwamba C, Meghani A, West NS, Hariyani S, Ddaaki W, et al. Selfie consents,  
755 remote rapport, and Zoom debriefings: collecting qualitative data amid a pandemic in four resource-  
756 constrained settings. *BMJ Global Health*. 2021;6(1):e004193.
- 757 10. Diniz D. Zika: do sertão nordestino à ameaça global: Editora José Olympio; 2016.
- 758 11. Brasil GFd. Estratégias de Resposta ao vírus Zika e o combate ao mosquito transmissor. .  
759 2016.
- 760 12. Social. MdSyP. PLAN DE RESPUESTA FRENTE A LA FIEBRE POR EL VIRUS ZIKA. . Bogotá; 2016.
- 761 13. Forero-Martínez LJ, Murad R, Calderón-Jaramillo M, Rivillas-García JC. Zika and women's  
762 sexual and reproductive health: Critical first steps to understand the role of gender in the Colombian  
763 epidemic. *International Journal of Gynecology & Obstetrics*. 2020;148:15-9.
- 764 14. Marbán-Castro E, Enguita-Fernández C, Romero-Acosta KC, Arrieta GJ, Marín-Cos A, Mattar  
765 S, et al. “One feels anger to know there is no one to help us!”. Perceptions of mothers of children  
766 with Zika virus-associated microcephaly in Caribbean Colombia: A qualitative study. *PLoS Neglected  
767 Tropical Diseases*. 2022;16(4):e0010328.
- 768 15. Gomez HM, Mejia Arbelaez C, Ocampo Cañas JA. A qualitative study of the experiences of  
769 pregnant women in accessing healthcare services during the Zika virus epidemic in Villavicencio,  
770 Colombia, 2015–2016. *International Journal of Gynecology & Obstetrics*. 2020;148:29-35.

- 771 16. Murthy BP, Vagi S, Desamu-Thorpe R, Avchen R. Assessment of state, local, and territorial  
772 Zika planning and preparedness activities—United States, June 2016–July 2017. *Morbidity and*  
773 *Mortality Weekly Report*. 2018;67(35):969.
- 774 17. Romero L, Corrada-Rivera RM, Huertas-Pagan X, Aquino-Serrano FV, Morales-Boscio AM,  
775 Sanchez-Cesareo M, et al. Access to Contraceptive Services in Puerto Rico: An Analysis of Policy and  
776 Practice Change Strategies, 2015-2018. *J Public Health Manag Pract*. 2022;28(2):E506-e17.
- 777 18. Rico. GdP. Orden Administrativa Número 429 del Departamento de Salud de Puerto Rico.  
778 2020.
- 779 19. Davies SE, Bennett B. A gendered human rights analysis of Ebola and Zika: locating gender  
780 in global health emergencies. *International Affairs*. 2016;92(5):1041-60.
- 781 20. Wenham C, Arevalo A, Coast E, Corrêa S, Cuellar K, Leone T, et al. Zika, abortion and health  
782 emergencies: a review of contemporary debates. *Globalization and health*. 2019;15:1-7.
- 783 21. Marteleto LJ, Weitzman A, Coutinho RZ, Alves SV. Women’s reproductive intentions and  
784 behaviors during the Zika epidemic in Brazil. *Population and Development Review*. 2017;43(2):199.
- 785 22. Coutinho RZ, Montalvo AV, Weitzman A, Marteleto LJ. Zika virus public health crisis and the  
786 perpetuation of gender inequality in Brazil. *Reproductive Health*. 2021;18(1):40.
- 787 23. Colombia. Gd. Corte constitucional de Colombia. Sentencia C-055 de 2022.
- 788 24. Linde Arias AR, Tristan-Cheever E, Furtado G, Siqueira E. “I don’t know if I have the courage”:  
789 reproductive choices in times of Zika. 2019.

790

## 791 **Supplementary information**

792 **S1 Table. Site-level overview of dates and procedures for participant recruitment, interviews,**  
793 **and psychological support during and following the interview**

794 **S2 Table. Supporting quotes in original Spanish or Portuguese and English translation**

795 **S3 Table. Codebook**

796
